# Supplementary material for: Mixed Infections Unravel Novel HCV Inter-Genotypic Recombinant Forms within the Conserved IRES Region
Source: MDPI journal article supplement (doi:10.3390/v16040560), 2024-04-03
Supplement: s1 [file s1]

## Supplementary Materials

**Supplementary Table S1.** Demographic characteristics of patients enrolled in this study and virological parameters

| Sample | Sex | Age (years) | Viral Load (log <sub>10</sub> ) <sup>a</sup> | Antiviral therapy <sup>b</sup> | Response to treatment <sup>c</sup> |
|--------|-----|-------------|----------------------------------------------|--------------------------------|------------------------------------|
| 598    | M   | 53          | 5.78                                         | PR                             | NR                                 |
| 624    | M   | 21          | 6.80                                         | ND                             | ND                                 |
| 955    | F   | 65          | 6.61                                         | PR                             | ND                                 |
| 982    | M   | 45          | 5.08                                         | PR                             | NA <sup>d</sup>                    |
| 990    | M   | 40          | 6.71                                         | PR                             | SVR                                |
| 991    | M   | 48          | 7.16                                         | ND                             | ND                                 |
| 996    | F   | 72          | 5.62                                         | ND                             | ND                                 |
| 1011   | M   | 31          | 6.48                                         | ND                             | ND                                 |
| 1016   | M   | 46          | 6.09                                         | ND                             | ND                                 |
| 1017   | M   | 58          | 6.17                                         | <i>Naïve</i>                   | NA                                 |
| 1018   | M   | 35          | 6.31                                         | <i>Naïve</i>                   | NA                                 |
| 1019   | M   | 46          | 6.39                                         | <i>Naïve</i>                   | NA                                 |
| 1020   | M   | 40          | 6.08                                         | <i>Naïve</i>                   | NA                                 |
| 1021   | M   | 67          | 5.79                                         | ND                             | ND                                 |
| 001    | M   | 51          | 6.37                                         | PR-PRT                         | NR-NR                              |
| 002    | F   | 53          | 3.75                                         | <i>Naïve</i>                   | NA                                 |
| 003    | F   | 45          | 4.30                                         | <i>Naïve</i>                   | NA                                 |
| 004    | F   | 71          | ND                                           | <i>Naïve</i>                   | NA                                 |
| 005    | F   | 52          | 8.09                                         | <i>Naïve</i>                   | NA                                 |
| 006    | M   | 45          | 7.00                                         | PR                             | NR                                 |
| 007    | F   | 35          | 8.00                                         | <i>Naïve</i>                   | NA                                 |
| 008    | F   | 51          | ND                                           | <i>Naïve</i>                   | NA                                 |
| 010    | F   | 34          | 4.85                                         | PR                             | NR                                 |
| 012    | M   | 45          | 6.65                                         | <i>Naïve</i>                   | NA                                 |
| 013    | M   | 64          | 4.70                                         | PR                             | NR                                 |
| 014    | M   | 51          | 5.39                                         | PR-PRT                         | NR-NR                              |
| 015    | M   | 30          | ND                                           | <i>Naïve</i>                   | NA                                 |
| 016    | F   | 63          | 6.29                                         | <i>Naïve</i>                   | NA                                 |
| 018    | M   | 47          | ND, 6.20                                     | PR, SOF/LDV                    | NR, Relapse <sup>e</sup>           |
| 020    | M   | 40          | 6.00                                         | PR                             | NR                                 |
| 021    | M   | 32          | 6.01                                         | <i>Naïve</i>                   | NA                                 |
| 022    | M   | 49          | 6.24                                         | PR                             | NR                                 |
| 024    | M   | 36          | ND                                           | <i>Naïve</i>                   | NA                                 |
| 025    | M   | 48          | 6.90                                         | PR                             | NR                                 |
| 026    | M   | 59          | ND                                           | IR                             | NR                                 |
| 027    | M   | 54          | 6.30, 7.10                                   | PR, SOF/LDV                    | NR, Relapse <sup>e</sup>           |
| 028    | M   | 42          | 4.36                                         | PR                             | NR                                 |
| 030    | M   | 37          | 5.30                                         | <i>Naïve</i>                   | NA                                 |
| 031    | M   | 45          | ND                                           | PR                             | NR                                 |
| 032    | M   | ND          | 5.10                                         | <i>Naïve</i>                   | NA                                 |
| 034    | F   | 58          | 5.60                                         | PR                             | NR                                 |
| 036    | F   | 54          | 5.30                                         | <i>Naïve</i>                   | NA                                 |
| 039    | M   | 43          | 6.49                                         | PR                             | NR                                 |

<sup>a</sup> Viral load at time of sample collection. Log<sub>10</sub> of viral load determined in international units per milliliter (IU/mL) with commercial kits COBAS®TaqMan HCV Test or Real Time HCV (Abbot), v2.0. <1.40 indicates detectable values, yet not quantifiable.

<sup>b</sup> **PR:** peg-IFN- $\alpha$ /ribavirin; ***Naïve*:** no treatment received; **PRT:** PR+telaprevir; **SOF/LDV:** sofosbuvir/ledipasvir; **IR:** IFN-  $\alpha$ /ribavirin

<sup>c</sup> **NR:** Non-responder; **SVR:** Sustained virological response

<sup>d</sup> Treatment suspended due to intolerance to interferon

<sup>e</sup> 2 samples from the same patient were collected, after non-response to PR and after relapse to SOF/LDV

**ND:** Not determined or unknown

**NA:** Not applicable

**Supplementary Table S2.** GenBank accession numbers of HCV full-genome sequences corresponding to the 8 genotypes described so far that were used for the NS5B phylogenetic tree.

| Genotype | Subtype | Country of isolation         | GenBank<br>Accession Nr | Observations                               |
|----------|---------|------------------------------|-------------------------|--------------------------------------------|
| 1        | 1a      | China                        | KC844049                | H77 Strain, subtype 1a reference sequence  |
|          |         | United States                | AF009606                |                                            |
|          |         | United States                | EF621489                |                                            |
|          |         | United Kingdom               | AJ278830                |                                            |
|          | 1b      | Germany                      | AJ238799                | Con1 strain, subtype 1b reference sequence |
|          |         | Brazil                       | EF032892                |                                            |
|          |         | Japan                        | D90208                  |                                            |
|          |         | Russia                       | AF176573                |                                            |
|          | 1c      | China                        | KC844047                |                                            |
|          |         | India                        | AY051292                |                                            |
|          |         | Indonesia                    | D14853                  |                                            |
| 2        | 2a      | Japan                        | AB047639                |                                            |
|          | 2b      | Denmark                      | JQ745651                |                                            |
|          |         | Japan                        | AB559564                |                                            |
|          | 2c      | France                       | KC197227                |                                            |
|          | 2i      | Viet Nam                     | DQ155561                |                                            |
|          | 2k      | Rep. Of Moldova              | AB031663                |                                            |
| 3        | 3a      | China                        | KC844041                | NZL1 strain, subtype 3a reference sequence |
|          |         | India                        | GQ275355                |                                            |
|          |         | New Zealand                  | D17763                  |                                            |
|          | 3b      | China                        | JQ065709                |                                            |
|          |         | China                        | KC844044                |                                            |
|          | 3k      | Canada                       | JF735122                |                                            |
|          |         | India                        | D63821                  |                                            |
| 4        | 4a      | Egypt                        | GU814265                |                                            |
|          |         | Japan                        | AB795432                |                                            |
|          | 4v      | Uganda                       | MH742365                |                                            |
| 5        | 5a      | China                        | KC844046                | incomplete 5'NCR                           |
|          |         | United Kingdom               | Y13184                  |                                            |
| 6        | 6a      | Viet Nam                     | EU246930                |                                            |
|          | 6b      | Thailand                     | D84262                  |                                            |
|          | 6d      | Viet Nam                     | D84263                  |                                            |
|          | 6f      | Thailand                     | DQ835760                |                                            |
|          | 6h      | Viet Nam                     | D84265                  |                                            |
|          | 6k      | China                        | DQ278891                |                                            |
|          | 6v      | China                        | EU798760                |                                            |
| 7        | 7a      | Canada                       | EF108306                |                                            |
|          | ND      | Democratic Republic of Congo | MH940291                |                                            |
| 8        | ND      | Canada                       | MH590701                |                                            |
|          |         | Canada                       | MH590700                |                                            |

ND: Not determined or Not assigned

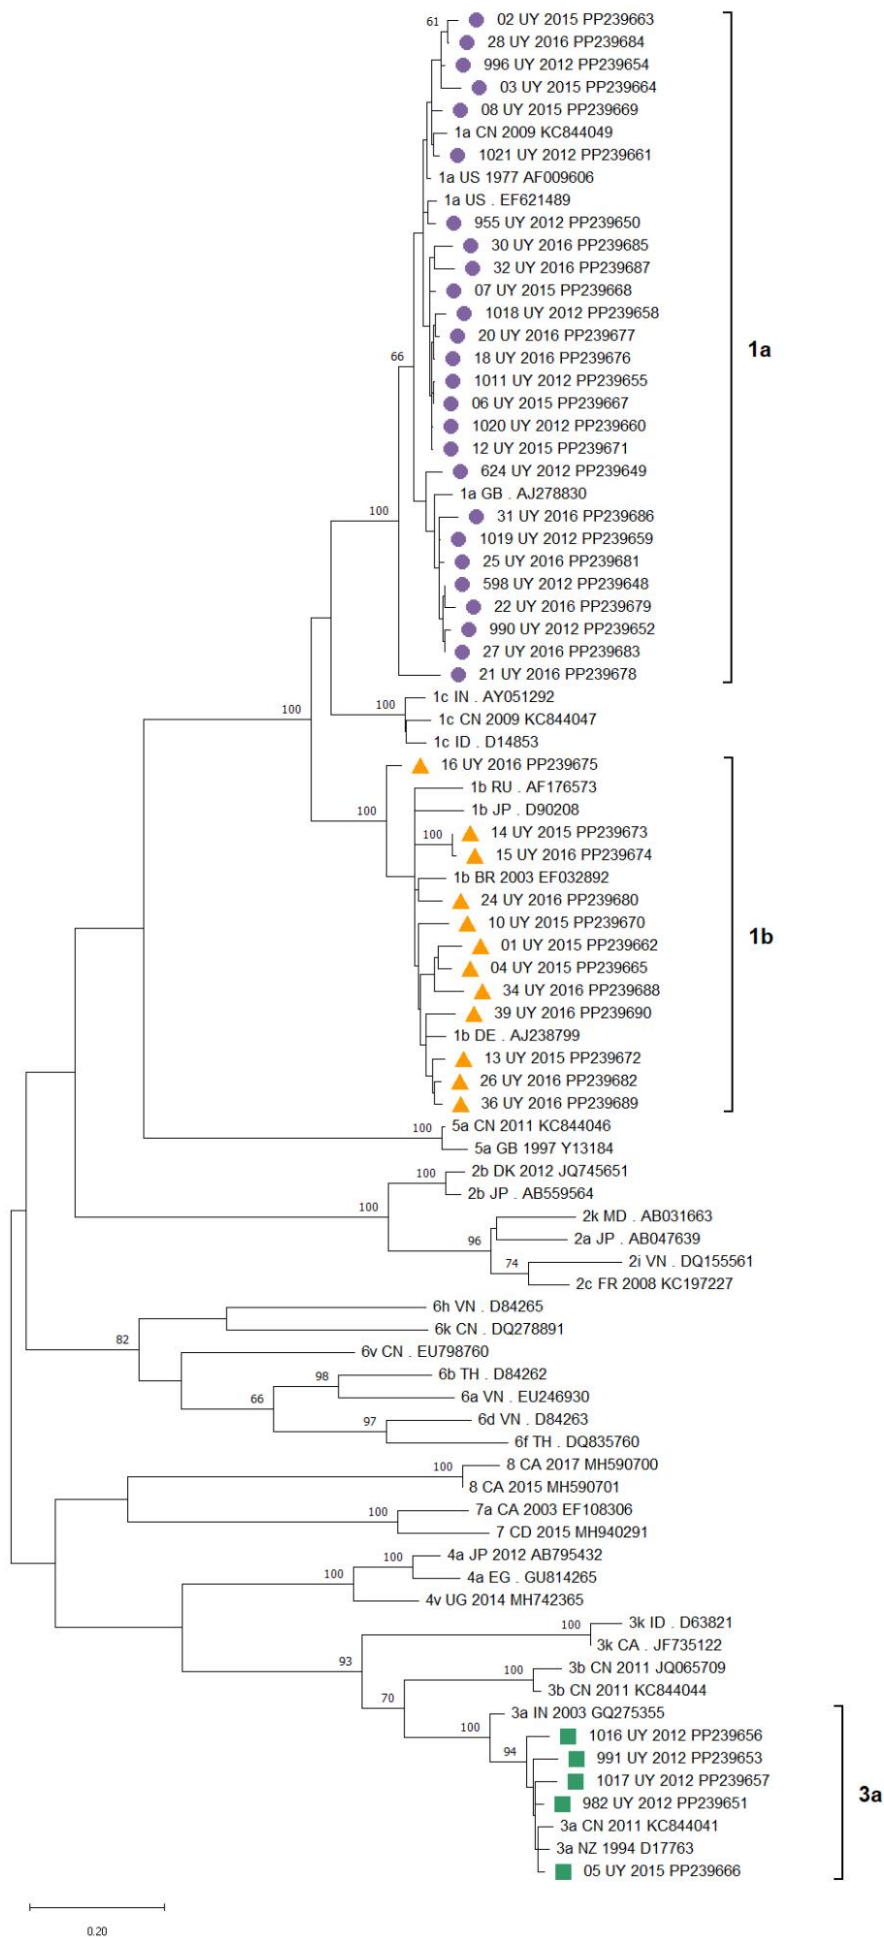

**Supplementary Figure S1. Maximum likelihood phylogenetic tree of HCV partial NS5B sequences.** The evolutionary history was inferred by using the Maximum Likelihood method and General Time Reversible model + Gamma distribution (5 categories (+G, parameter = 0.9431)) + invariable sites ([+I], 15.35% sites). Numbers at each branch of the tree show bootstrap support values  $>60\%$ . The tree is drawn to scale, with branch lengths measured in the number of substitutions per site. This analysis involved 83 nucleotide sequences: 40 reference sequences for each HCV genotype and main subtypes (labeled with genotype, 2-letter country-code, year of isolation and GenBank Accession No) and 43 Uruguayan samples (labeled with strain nr, UY, year of isolation and GenBank Accession No). Uruguayan samples are indicated with purple dots (subtype 1a), orange triangles (subtype 1b) and green squares (subtype 3a). There were a total of 316 positions in the final dataset. Evolutionary analyses were conducted in MEGA11.0.13[45].

(A) Sample 1021 - major genotype 1a

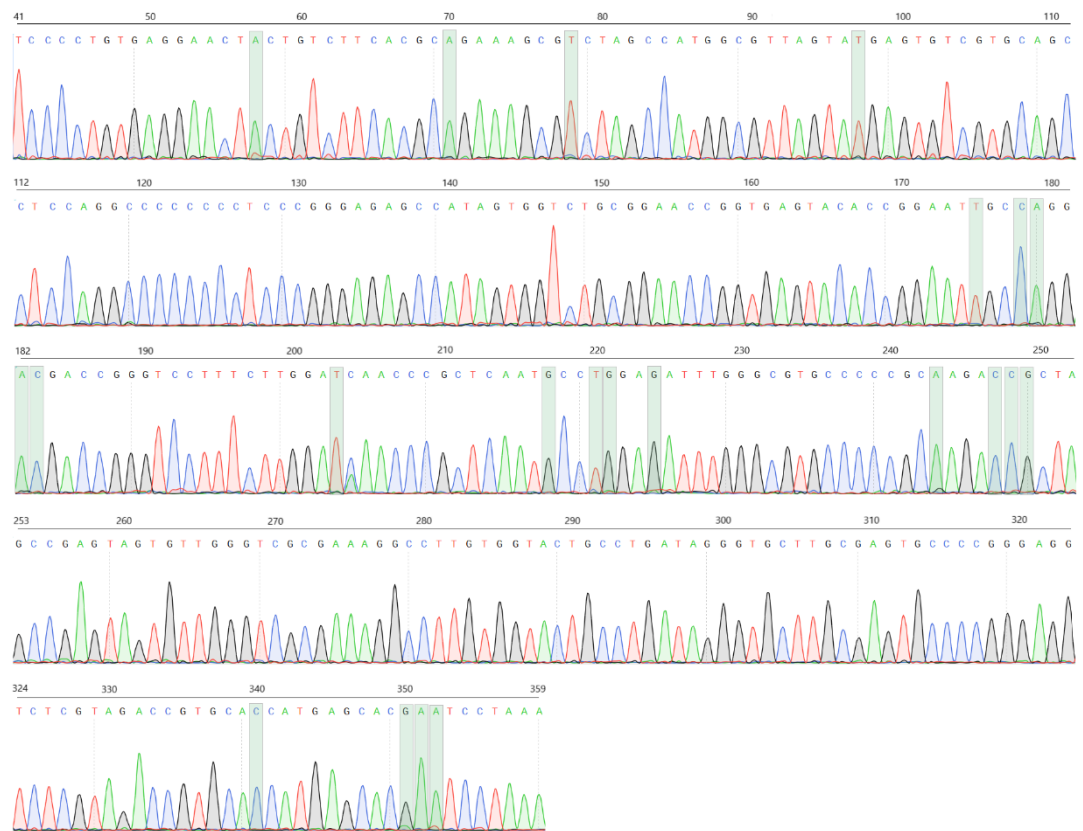

(B) Sample 05 - major genotype 3a

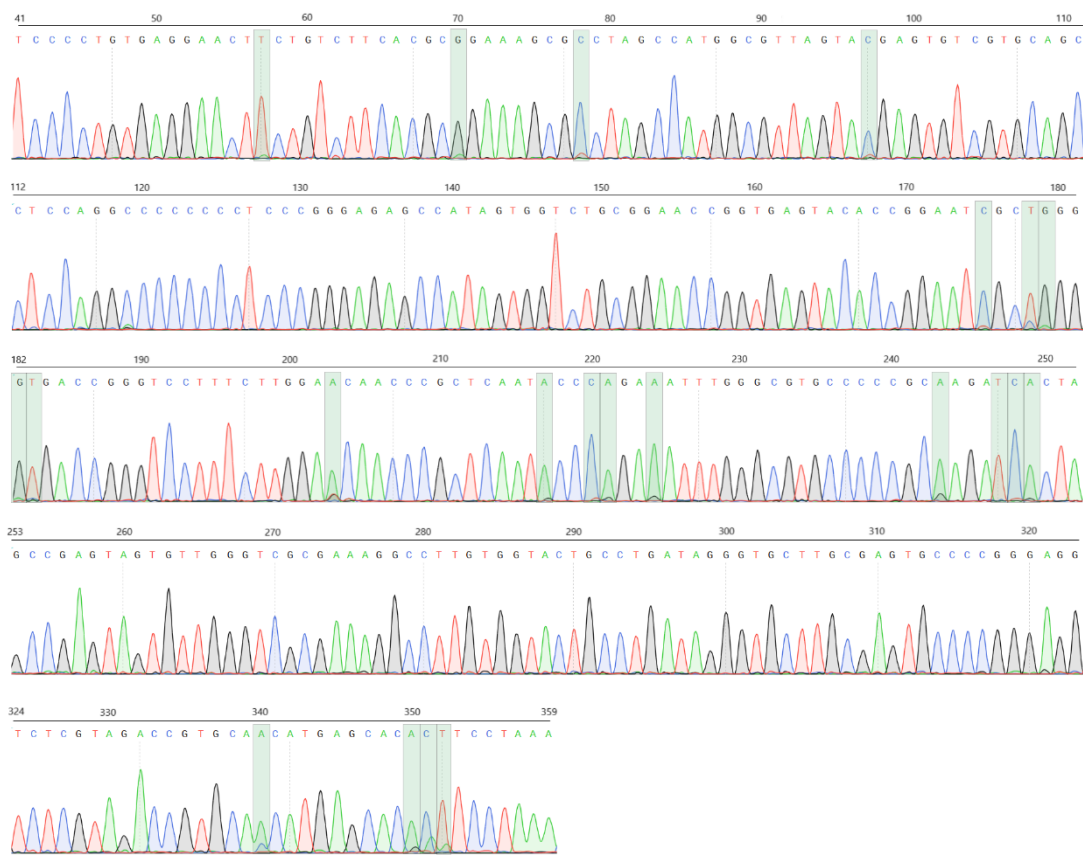

**Supplementary Figure S2.** Sanger sequencing electropherograms of IRES from samples with suspected mixed infections. A) Sample 1021 - major genotype 1a. B) Sample 05 - major genotype 3a. Full IRES region is shown, including 5'NCR from position 41 onwards and core region up to position 18 (nucleotide 359 of the genome). Numbering is according to strain H77 (reference sequence for genotype 1a). All positions highlighted in green indicate polymorphic sites between genotype 1a and 3a within the 5'NCR or the core regions. Double peaks suggesting possible mixed infections are more pronounced in sample 05, in agreement with NGS frequencies being higher for the minor genotype.

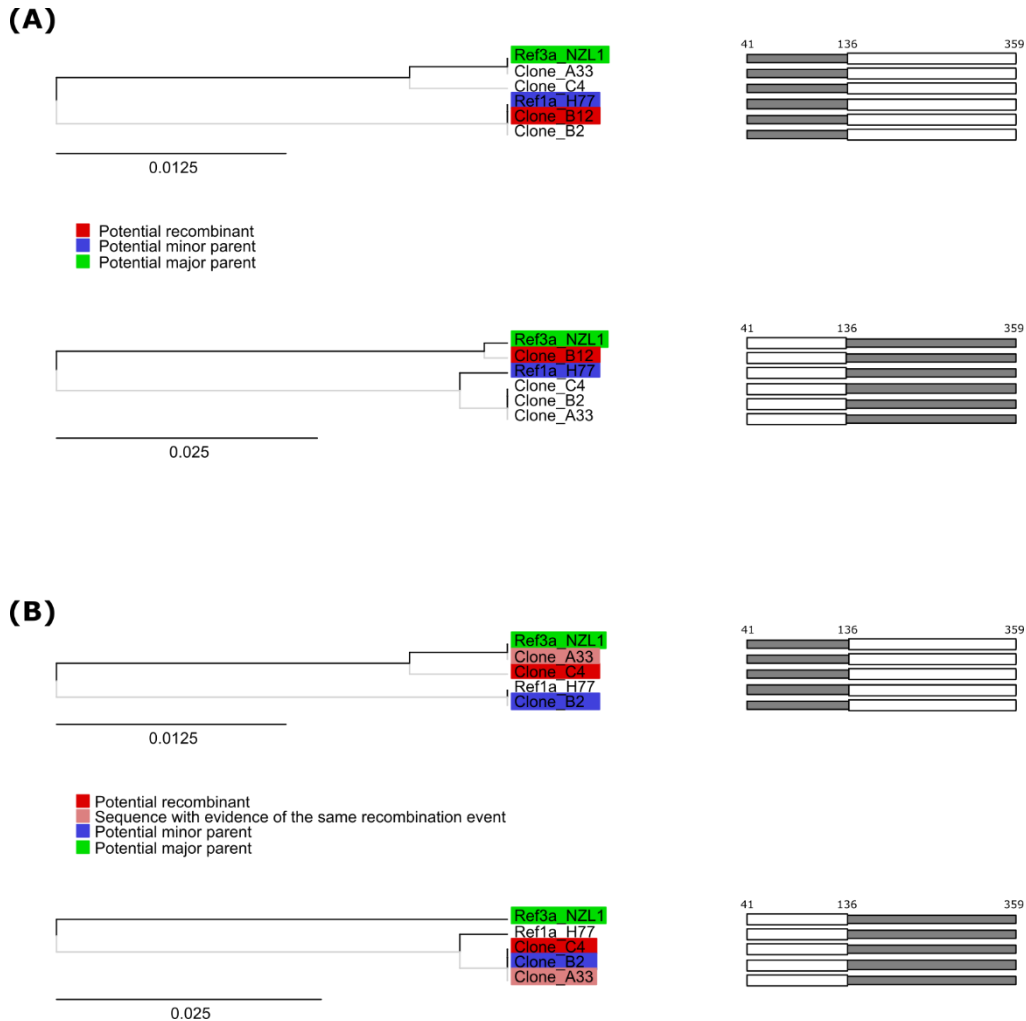

**Supplementary Figure S3. UPGMA phylogenetic tree of HCV putative recombinant clones derived from RDP4.101 software analyses.** Putative recombinant clone B12 (A) and C4/A33 (B) phylogenetic trees generated with the UPGMA agglomerative (bottom-up) hierarchical clustering method with default settings using RDP4.101 [55]. Top trees correspond to 5' portions of the IRES (nucleotides 41 to 135) and are indicated by grey bars on the right of each top tree. Bottom trees correspond to 3' portions of the IRES (nucleotides 136 to 359) and are indicated by grey bars on the right of each bottom tree. Potential major parents are highlighted in green, potential minor parents are highlighted in blue and putative recombinants in red and orange.
